# Supplementary material for: Revealing the Salmo salar NLRP3 Inflammasome: Insights from Structural Modeling and Transcriptome Analysis
Source: MDPI journal article supplement (doi:10.3390/ijms241914556), 2023-09-26
Supplement: s1 [file s1]

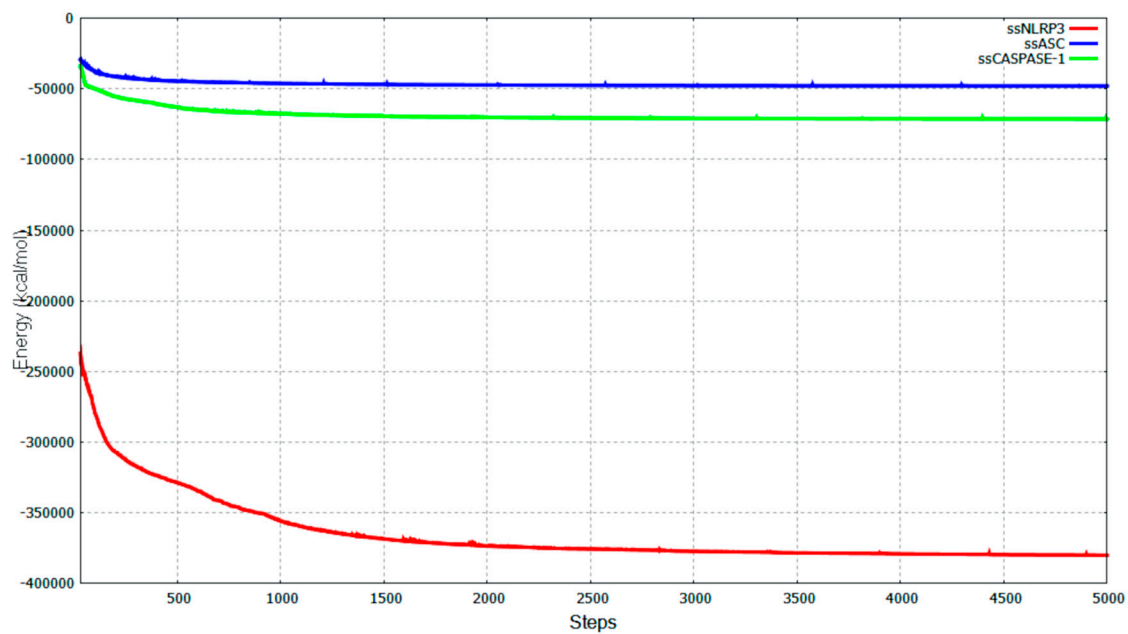

**Supplementary Figure S1.** Energy minimization of (a) ssNLRP3, (b) ssASC, and (c) ssCaspase-1 for 5000 steps.

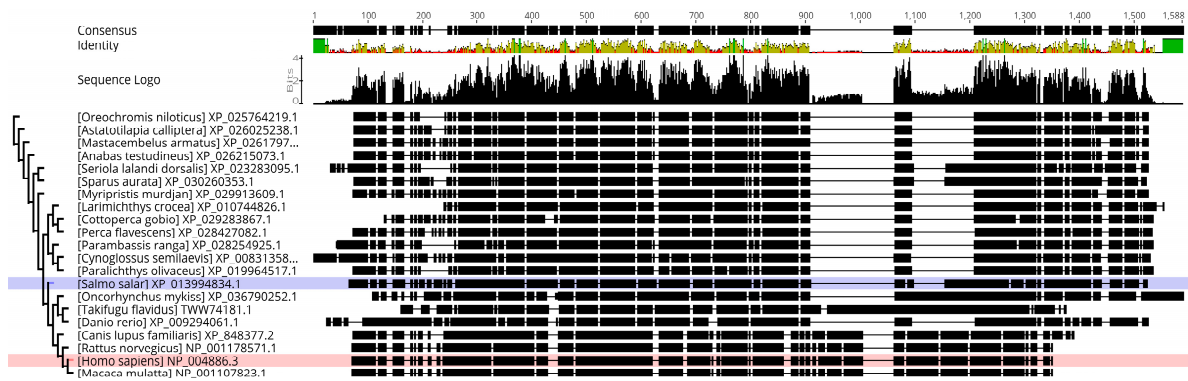

**Supplementary Figure S2.** Sequence multiple alignment of NLRP3 from different organisms.

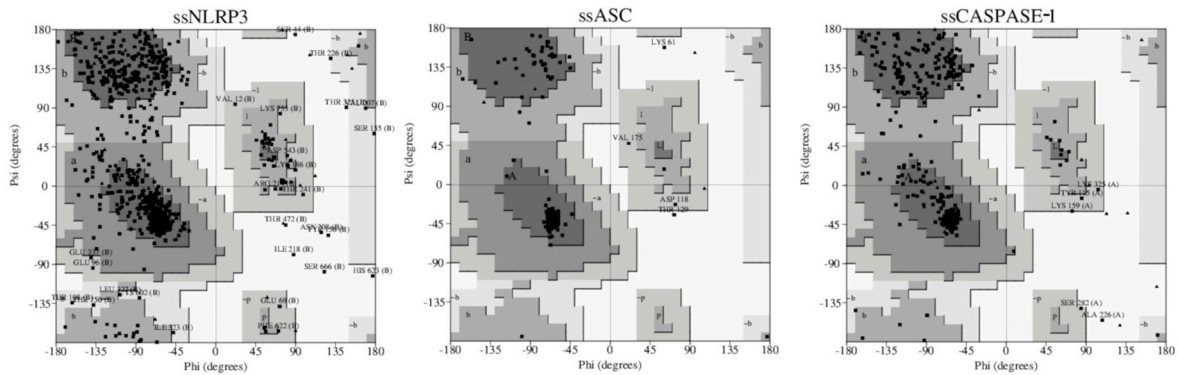

**Supplementary Figure S3.** Conformational analyses of inflammasome components. Ramachandran plots for (a) SsNLRP3, (b) SsASC, and (c) SsCaspase-1, produced with PROCHECK. The core regions are shown in dark gray, allowed regions in gray, and generously allowed regions in light gray. The disallowed regions are shown in white.

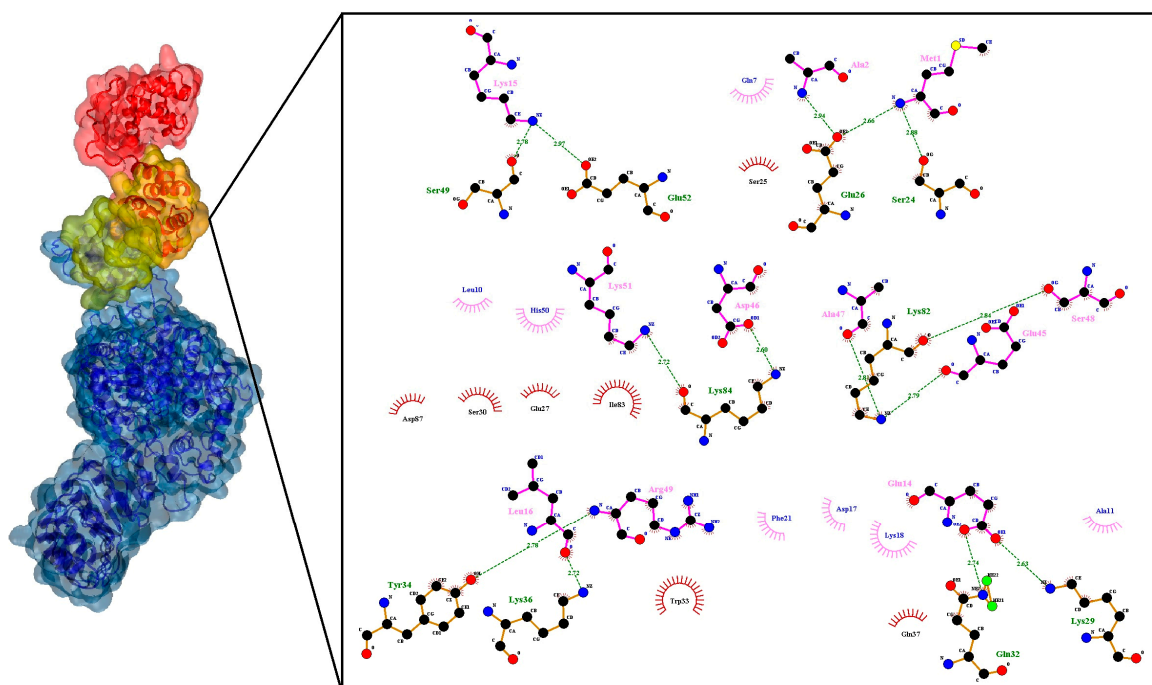

**Supplementary Figure S4.** Visualization of binding sites of the SsNLRP3/SsASC complex.

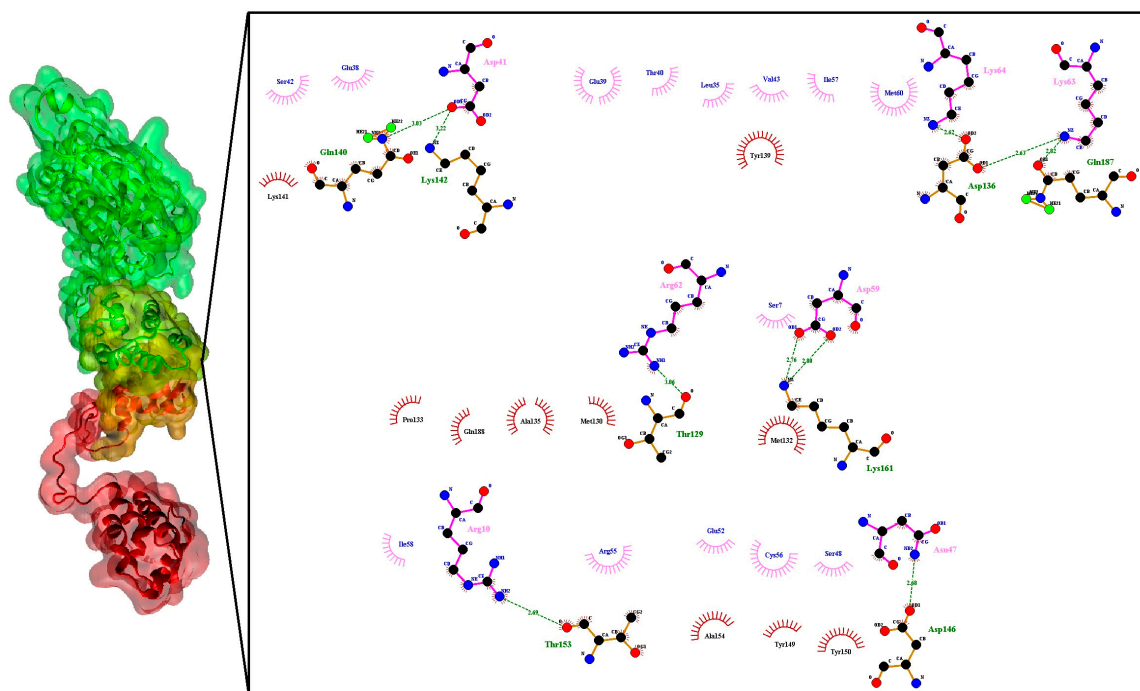

**Supplementary Figure S5.** Visualization of binding sites of the SsASC/SsCaspase-1 complex.

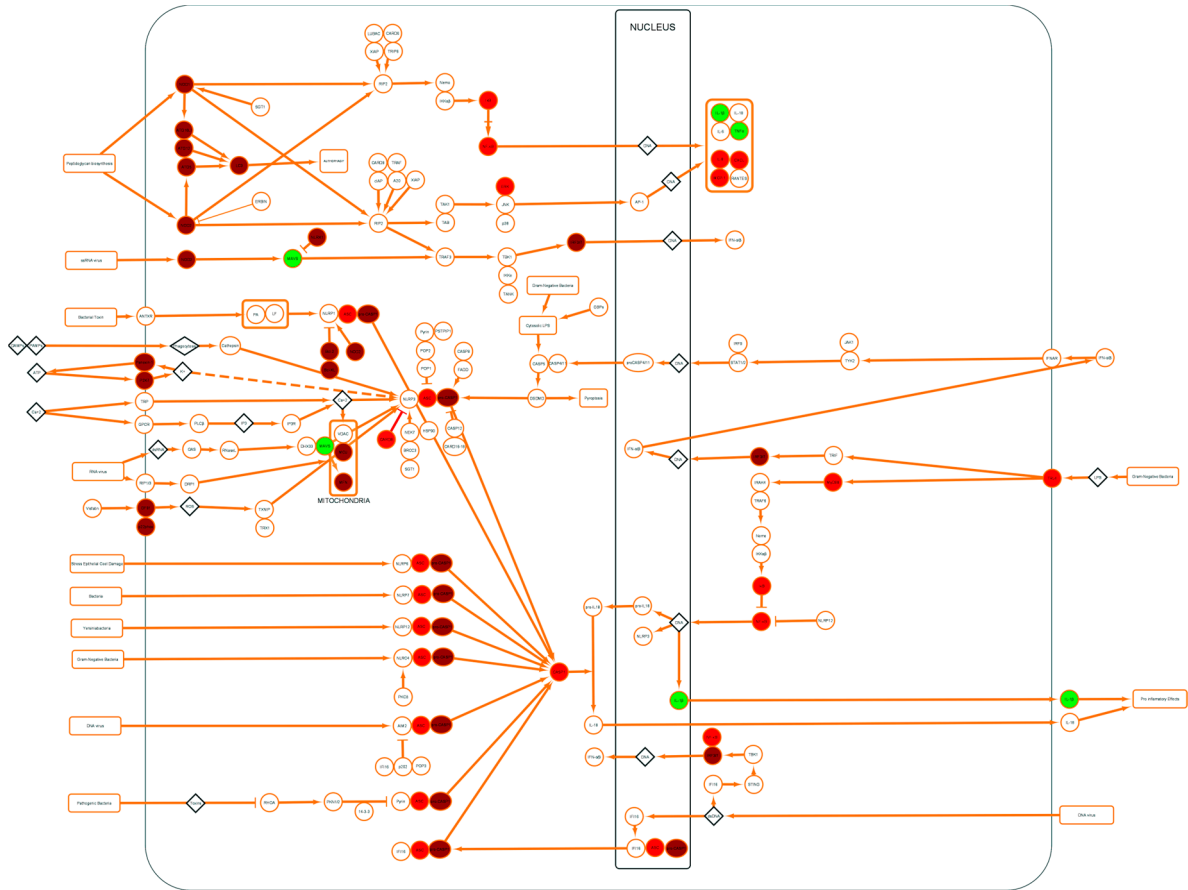

**Supplementary Figure S6.** Representation of all the genes analyzed in the transcriptome data. Downregulated genes are shown in red, and upregulated genes are shown in green.
